# Supplementary material for: Dynamic Vascular Imaging Using Active Breast Thermography
Source: Preprints.org preprint supplement (doi:10.20944/preprints202302.0274.v1), 2023-02-16

**Supplementary material**

Patient 282 is Left sick. Location: inner lower quadrant


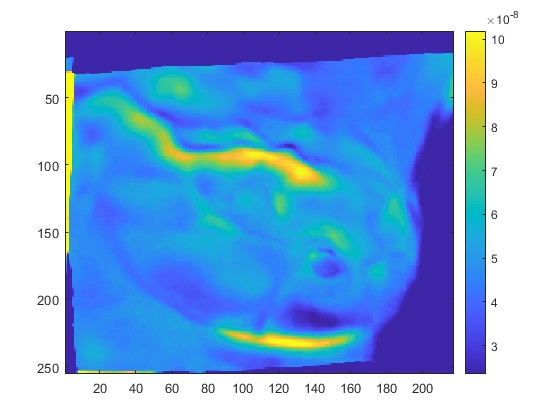

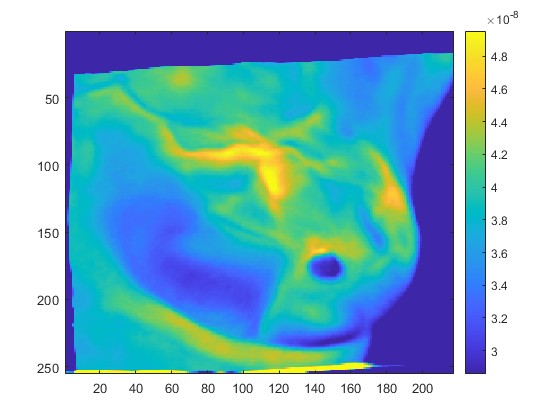

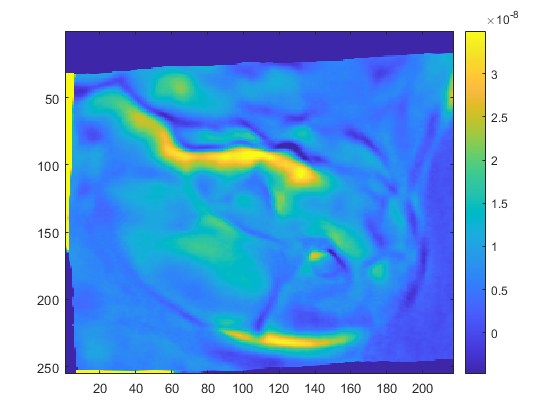

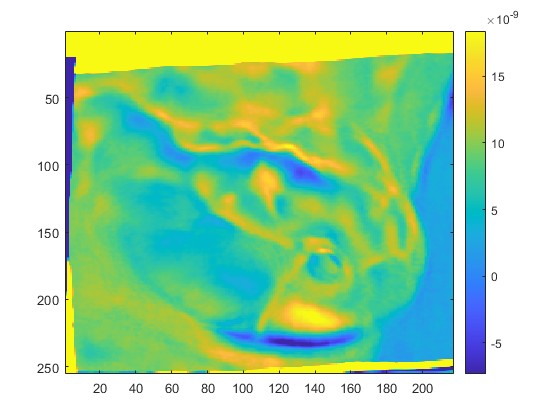


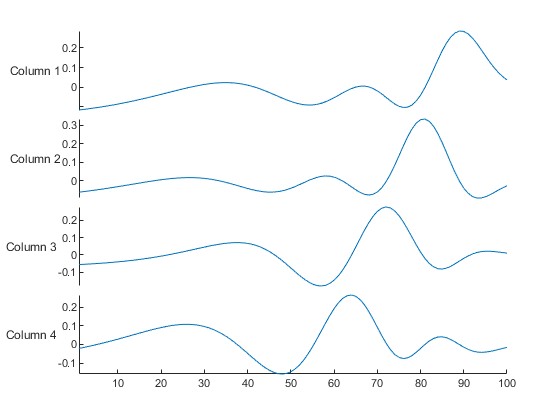


**Supplementary material** Patient 282 Right healthy


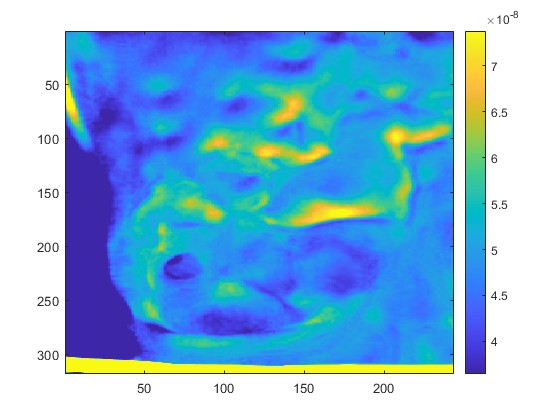

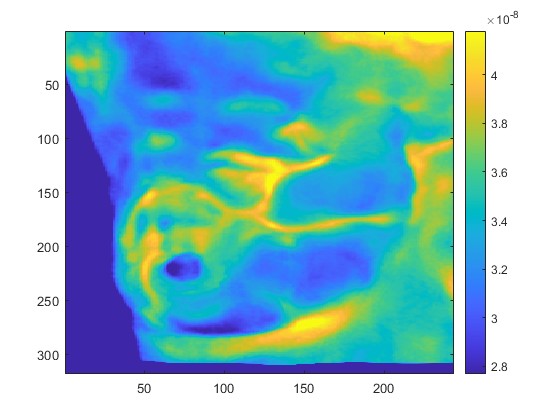


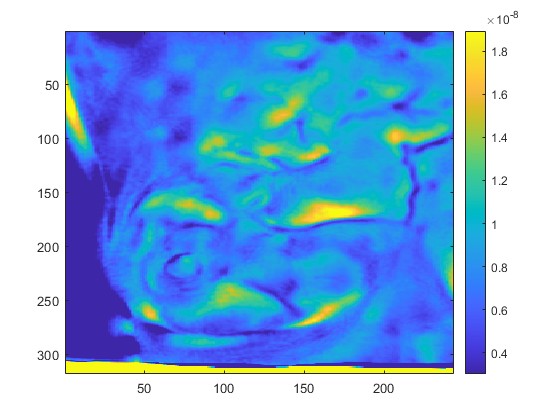

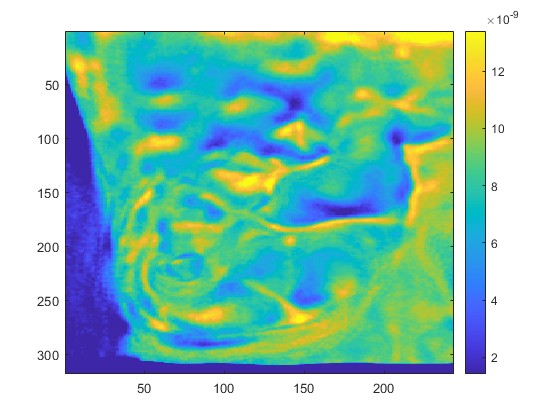


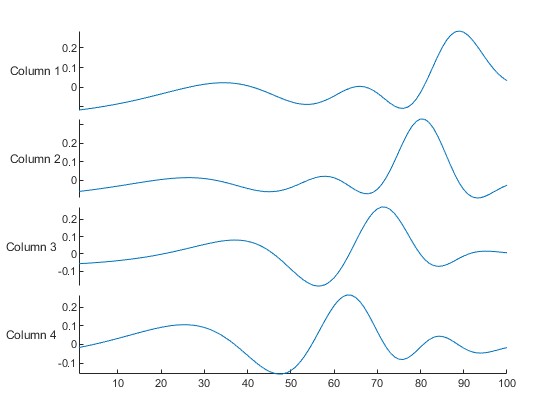


**Supplementary material** Patient 285 Left healthy.


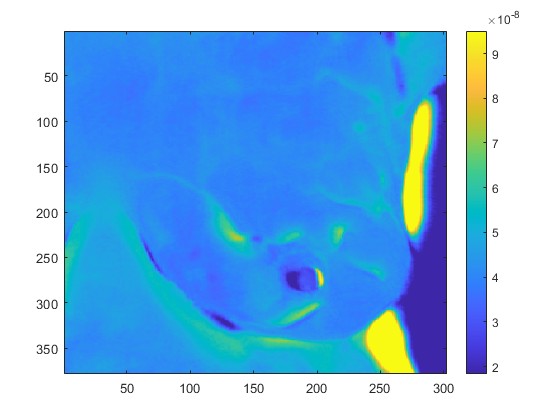

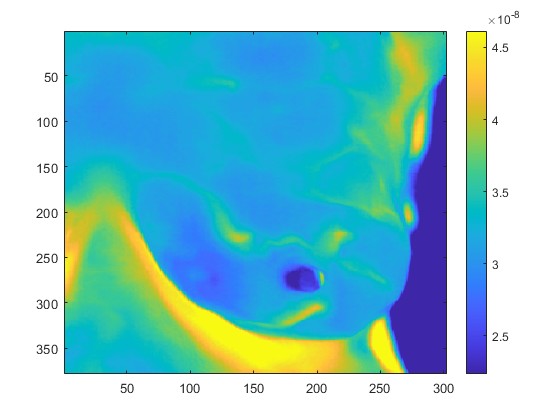


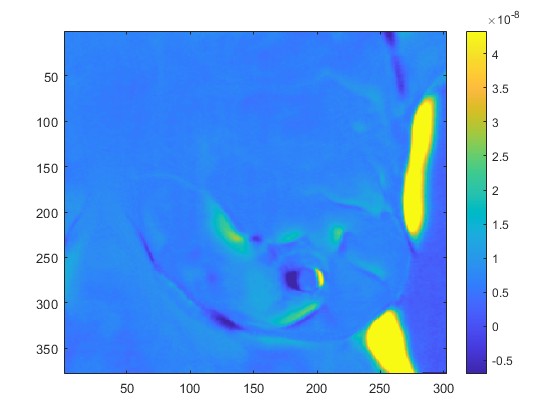

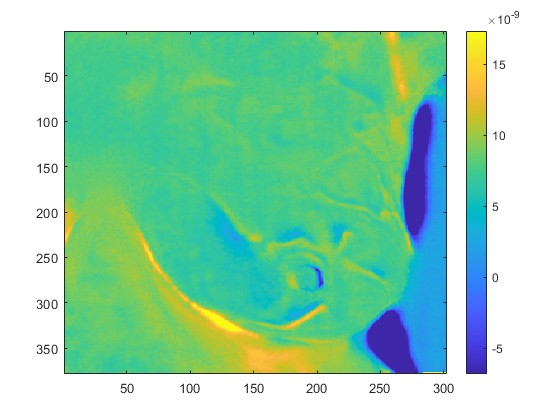


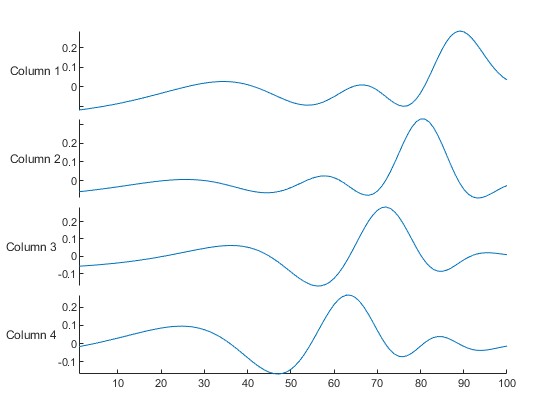


Patient 285 is Right sick. Location: outer lower quadrant


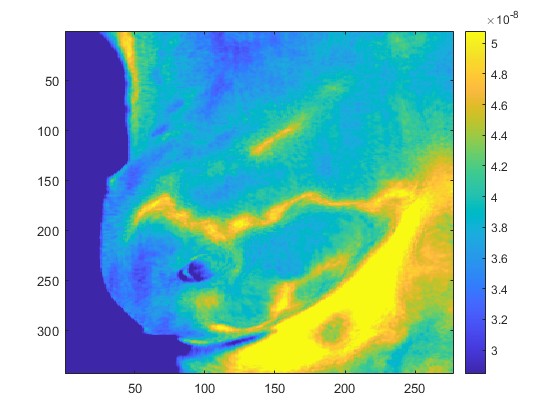

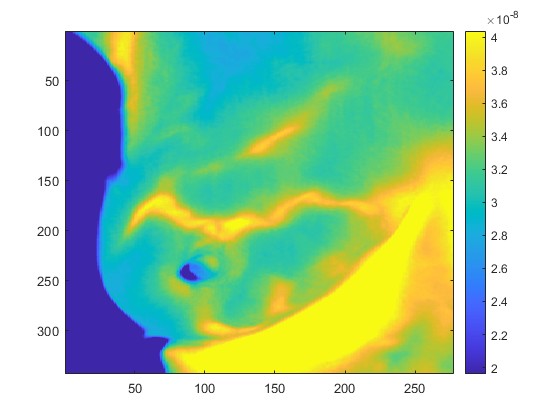


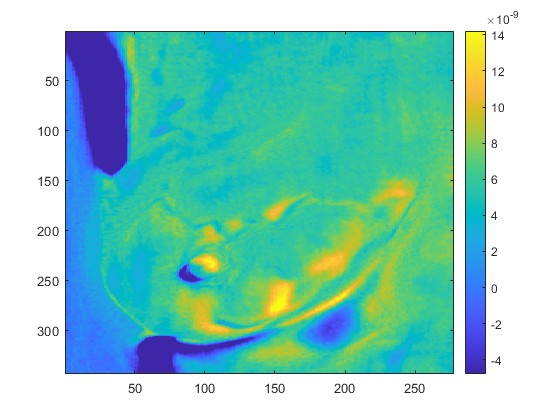

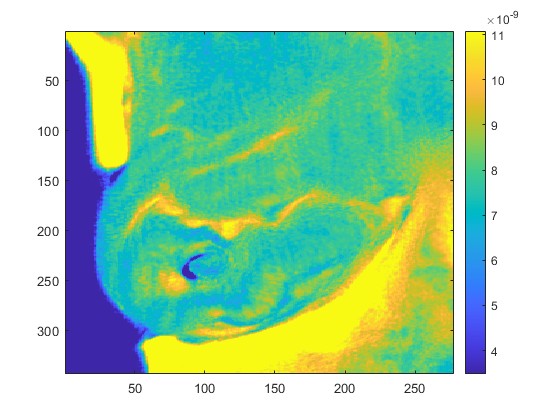


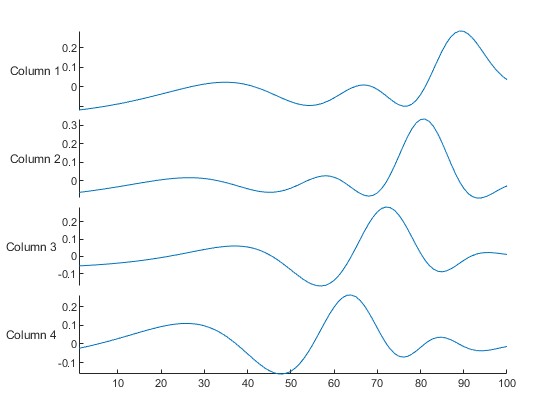


**Supplementary material** Patient 286 Left sick. Location: upper outer quadrant
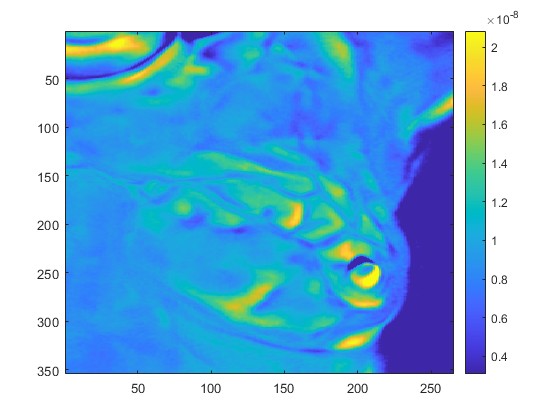

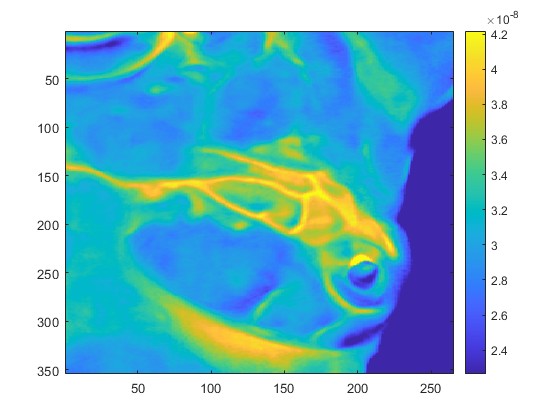

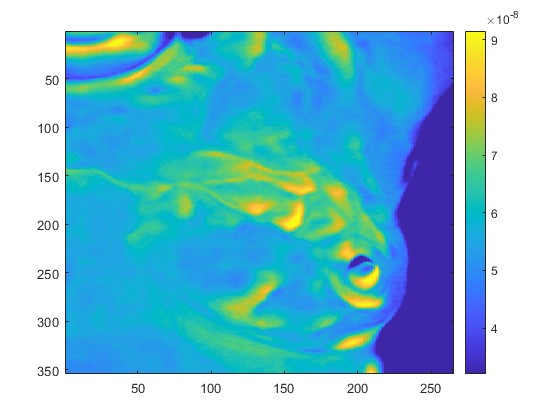

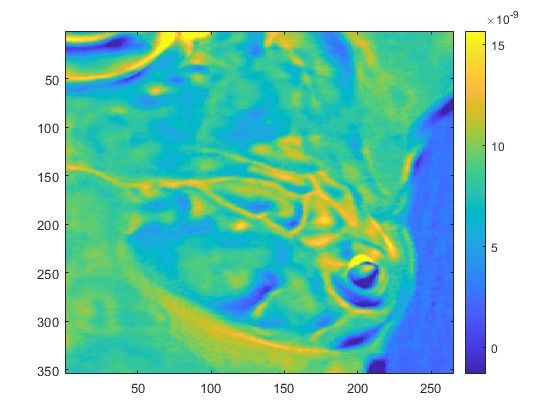


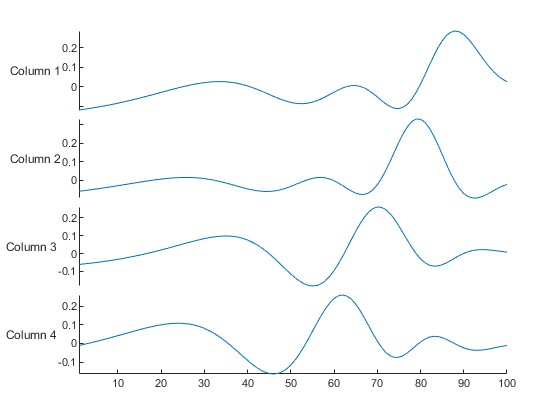


Patient 286 Right healthy


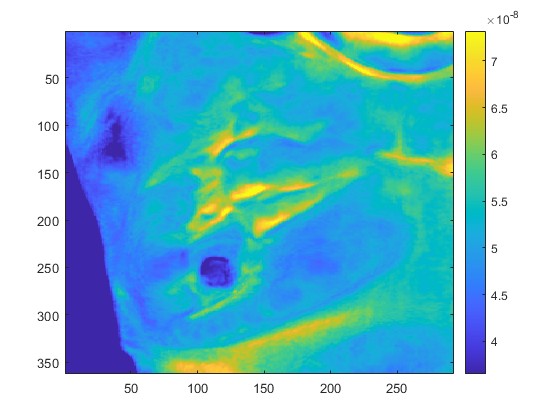

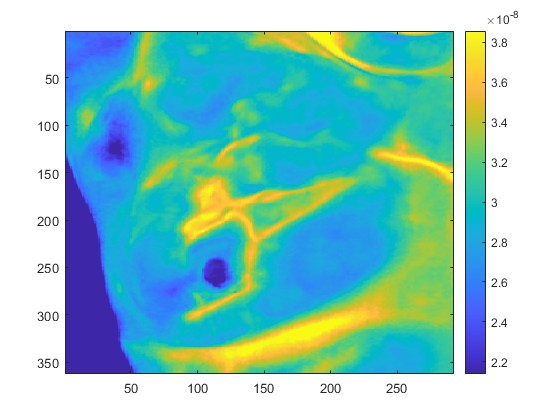

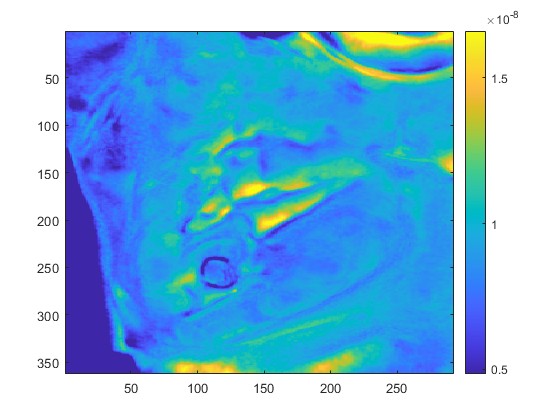

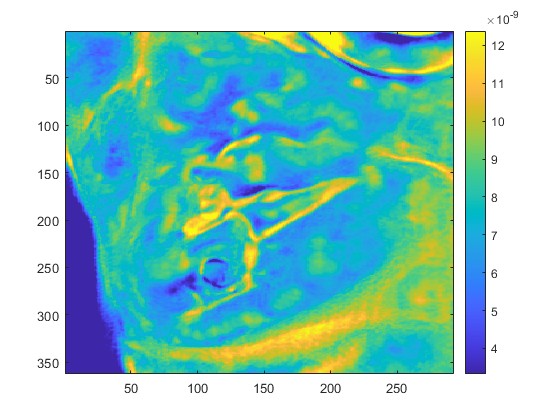


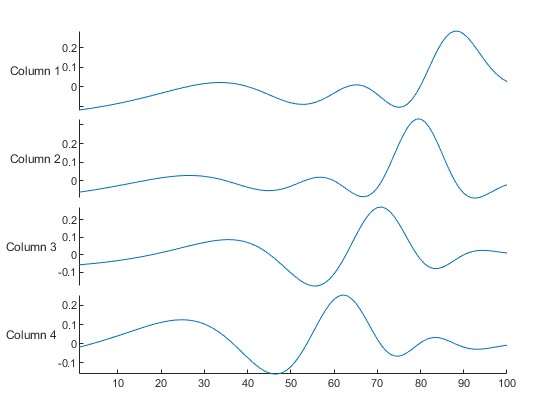

Supplement: Supplementary file 1 [file supplementary]
